# Supplementary material for: A smart artificial glutathione peroxidase with temperature responsive activity constructed by host–guest interaction and self-assembly
Source: Royal Society of Chemistry journal article supplement (doi:10.1039/c4ra04042b), 2014-01-01
Supplement: c4ra04042b1.pdf [file c4ra04042b1.pdf]

# A smart artificial glutathione peroxidase with temperature responsive activity constructed by host-guest interaction and self-assembly

Yanzhen Yin,<sup>a\*</sup> Shufei Jiao<sup>a</sup>, Chao Lang,<sup>b</sup> Junqiu Liu<sup>b\*</sup>

a: School of Chemistry and Chemical Engineering, Qinzhou University, No.89, Xihuan Nanlu, Qinzhou 535000, People's Republic of China. E-mail:yinyanzhen2013@163.com; Fax: +86-0777-2860226

b: State Key Laboratory of Supramolecular Structure and Materials, Jilin University, Changchun 130012, People's Republic of China E-mail:junqiliu@jlu.edu.cn, Fax: +8643185193421;

## Synthesis of ADA-Te

**ADA-Te** was synthesized according to our previous synthesis method of bis-(3-acryloyloxypropyl)-telluride except acryloyl chloride was replaced by 1-adamantanecarbonyl chloride<sup>1</sup>. Its structure was determined by Bruker 300MHz spectrometer using a TMS proton signal as the internal standard. <sup>1</sup>H NMR (300 MHz, CDCl<sub>3</sub>) δ (ppm) 4.09 (t, 2 H), 3.71 (t, 2 H), 2.72 (t, 2 H), 2.66 (t, 2 H), 2.07 (m, 2 H), 2.00 (s, 3 H), 1.88 (s, 6 H), 1.71 (s, 6 H).

## Synthesis of ADA-Arg

1-adamantanecarbonyl chloride (7.95 g, 0.040 mol) was dissolved in 30 mL anhydrous tetrahydrofuran and added dropwise to a stirred solution of L-Arginine (6.89 g, 0.040 mol) and triethylamine (5.55 mL, 0.040 mol) in anhydrous tetrahydrofuran (90 mL) at 0°C. After the addition was completed, the mixture was stirred for 3 h at room temperature. The precipitate triethylamine hydrochloride was filtered and the filtrate was concentrated under a vacuum. The product was purified by silica gel flash chromatography (methanol). After the removal of solvents, the product was isolated as colorless solid (yield, 72.5%). Its structure was determined by Bruker 300MHz spectrometer using a TMS proton signal as the internal standard. <sup>1</sup>H NMR (300 MHz, D<sub>2</sub>O) δ (ppm) 4.25 (t, 1 H), 3.15 (t, 2 H), 1.97 (s, 3 H), 1.79 (s, 6 H), 1.72-1.51 (m, 10 H).

## Synthesis of CD-Br

**CD-Br** was synthesized according to the preparing method of **triazol-CD monomer 2** in our previous report except acryloyl chloride was replaced by 2-bromopropanoic bromide<sup>2</sup>. Its structure was determined by Bruker 300MHz spectrometer using a TMS proton signal as the

internal standard. <sup>1</sup>H NMR (300 MHz, D<sub>2</sub>O) δ (ppm) 8.02 (s, 1 H), 5.07 (d, 7 H), 4.33 (t, 4 H), 4.24 (t, 2 H), 4.12 (m, 1 H), 3.67-3.86 (m 56H (14 H of glycol and 40 H of cyclodextrin)), 1.87 (d, 3 H)

### Synthesis of CD-PNIPAM

**CD-PNIPAM** was synthesized according to the polymerization procedure reported by Masci et al<sup>3</sup>. The typical procedure was shown as follows: NIPAM (appropriate amount), Me<sub>6</sub>TREN (115.1 mg, 0.5 mmol), water (5.0 mL) and DMF (5.0 mL) were introduced into a schlenk tube equipped with a magnetic stirring bar, followed by two freeze-pump-thaw cycle. Then, CuBr (71.7 mg, 0.5 mmol) was added under nitrogen and followed by two freeze-pump-thaw cycles. Finally, the initiator **CD-Br** (381.8 mg, 0.25 mmol) was dissolved in 1.0 mL DMF and added to the schlenk tube via a syringe to start the polymerization. The mixture was stirred for 12 h at 30°C. Then the mixture was exposed to air to terminate the polymerization and dialyzed against water for 2 d, a colorless polymer was obtained after the aqueous solution was freeze-dried. Herein, three kinds of **CD-PNIPAMs** were synthesized. The GPC analysis was like this: GPC analysis of one polymer revealed a Mn of 9815 and a polydispersity, Mw/Mn, of 1.50, the degree of polymerization (DPs) was estimated to be 73, this polymer was denoted as **CD-PNIPAM<sub>73</sub>**; GPC analysis of one polymer revealed a Mn of 16344 and a polydispersity, Mw/Mn, of 1.61, the degree of polymerization (DPs) was estimated to be 130, this polymer was denoted as **CD-PNIPAM<sub>130</sub>**; GPC analysis of one polymer revealed a Mn of 43871 and a polydispersity, Mw/Mn, of 1.45, the degree of polymerization (DPs) was estimated to be 374, this polymer was denoted as **CD-PNIPAM<sub>374</sub>**.

### References

1. X. Huang, Y. Z. Yin, X. Jiang, Y. Tang, J. Y. Xu, J. Q. Liu and J. C. Shen, *Macromol. Biosci.*, 2009, **9**, 1202-1210.
2. Y. Z. Yin, X. Huang, C. Y. Lv, L. Wang, S. J. Yu, Q. Luo, J. Y. Xu and J. Q. Liu, *Macromol. Biosci.*, 2010, **10**, 1505-1516.

3. G. Masci, L. Giacomelli and V. Crescenzi, *Macromol. Rapid Commun.* , 2004, **25**, 559-564.
